# Supplementary material
Source: Springer Nature journal article supplement (https://www.springermedizin.de/resource/supplementary/12889_2008_1358_MOESM2_ESM.pdf/9503028)

**A.**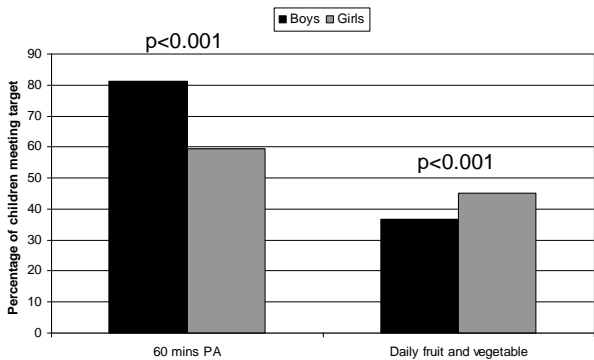**B.**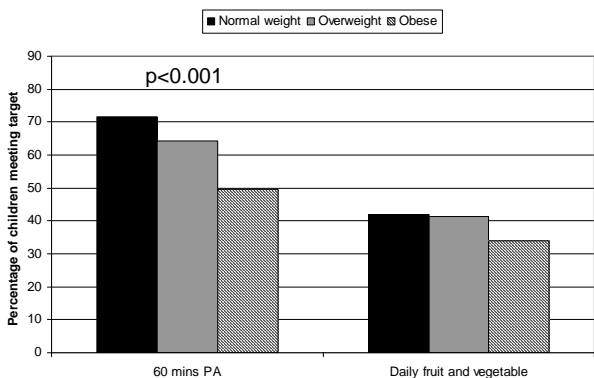**C.**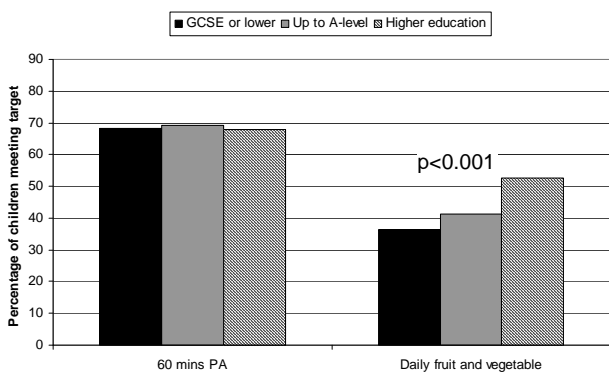**D.**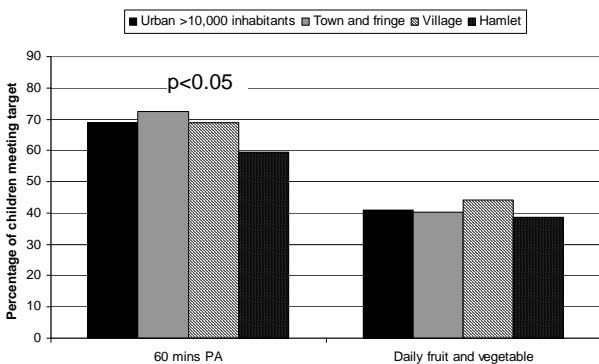

Supplement: MOESM2 [file 9503028]
